# Supplementary material
Source: publisher figshare collection journal article supplement (https://acs.figshare.com/ndownloader/files/4451530)

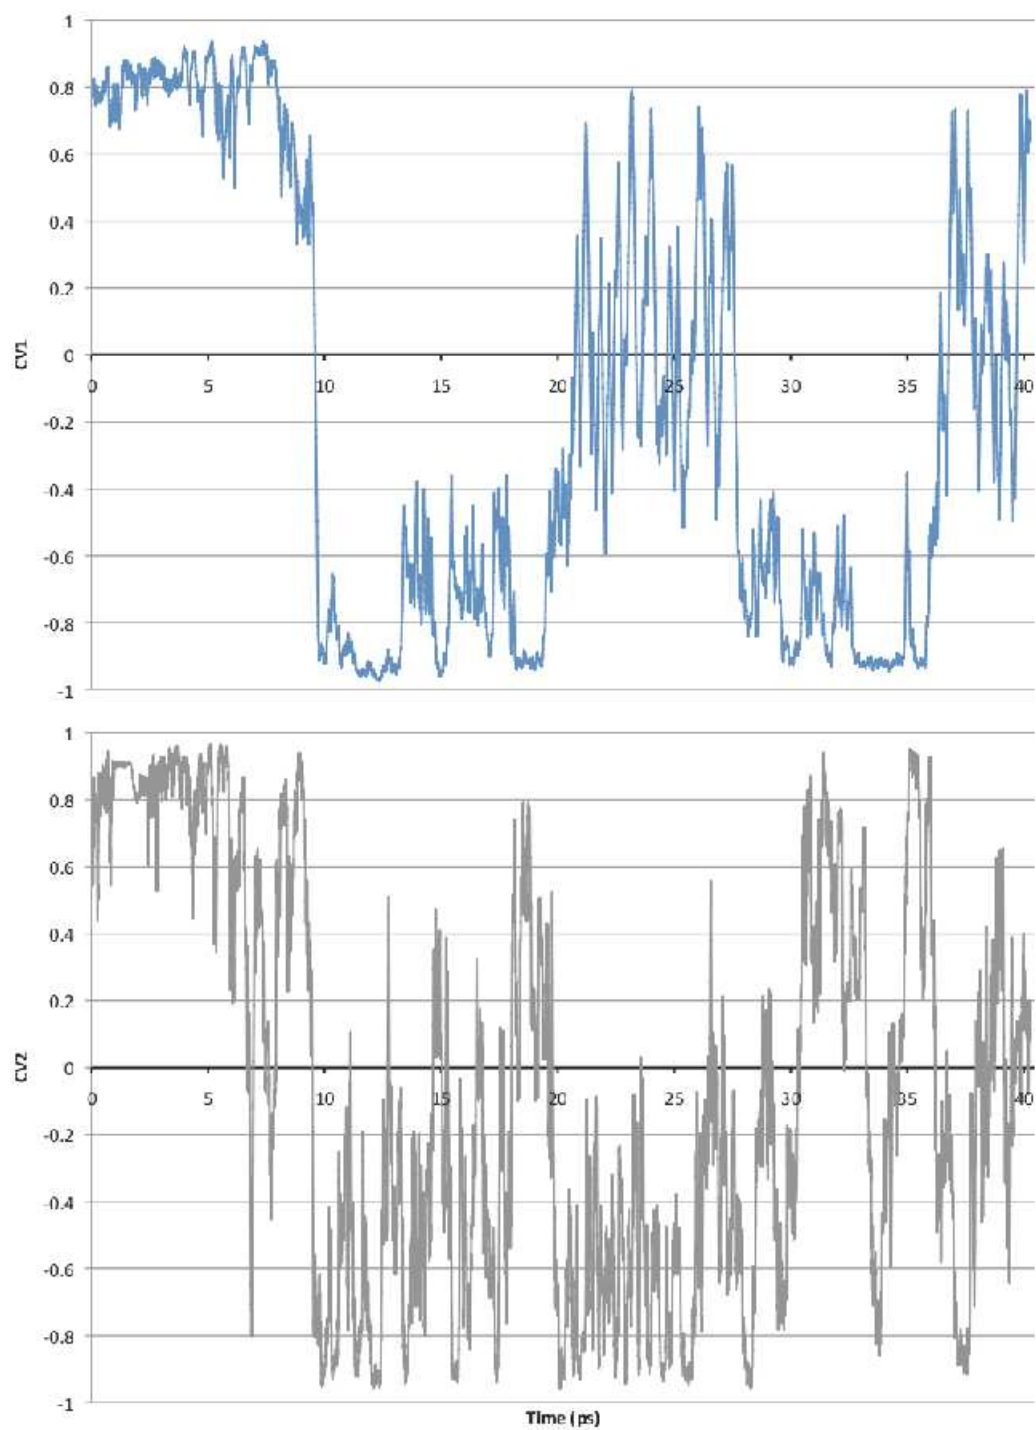

**Figure S4.** Time evolution of the collective variable along the metadynamics simulation.

Supplement: Supplementary file 1 [file 4451530]
